# Supplementary material
Source: PubMed Central journal article supplement (PMC4347219)
Supplement: JCI75894sd1.pdf [file JCI75894sd1.pdf]

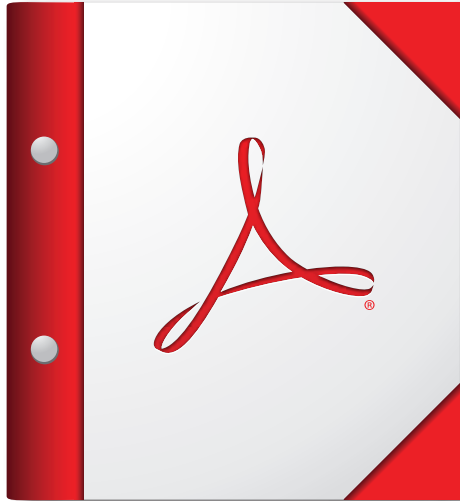

**For the best experience, open this PDF portfolio in  
Acrobat X or Adobe Reader X, or later.**

[Get Adobe Reader Now!](#)
